# Supplementary material
Source: PubMed Central journal article supplement (PMC2529057)
Supplement: 0806133105_0806133105SI.pdf [file 0806133105_0806133105SI.pdf]

# Supporting Information

Matrone *et al.* 10.1073/pnas.0806133105

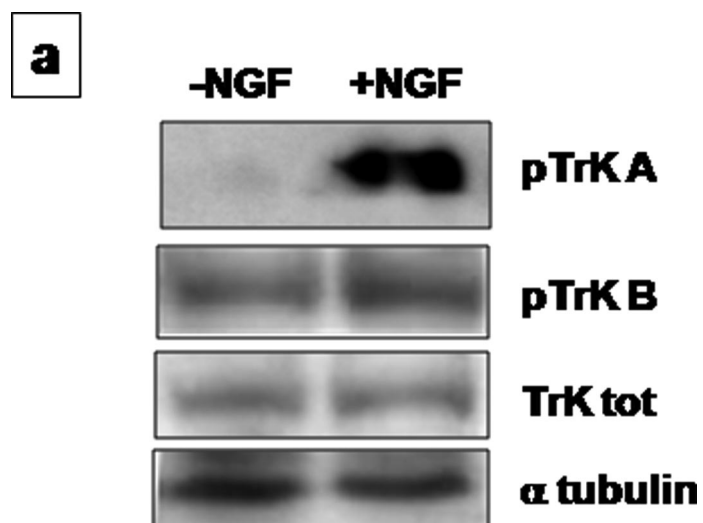

**Fig. S1.** Western blot analysis of lysates from hippocampal neurons incubated with (+NGF) or without NGF (–NGF) for 48 h performed with antibodies against pospho tyrosine kinase receptor A and B (pTrKA and pTrKB, respectively), and with an antibody that detects the basal level of both TrK receptors (see *Methods*).

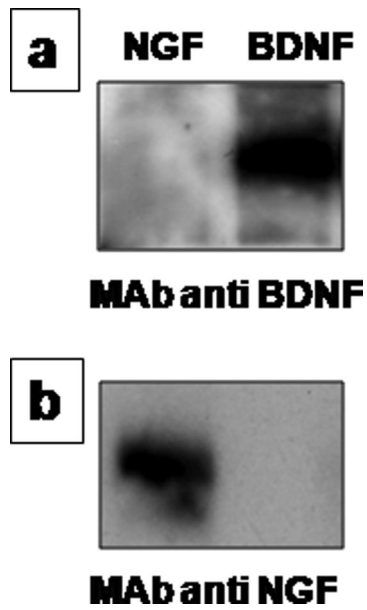

**Fig. S2.** Western blot analysis performed with antibodies against BDNF or NGF (MAb  $\alpha$ BDNF 30  $\mu$ g/ml or MAb $\alpha$ NGF 30  $\mu$ g/ml). NGF (A) or BDNF (B) (100 ng) were loaded on 4–12% SDS/PAGE and probed with antibodies that selectively bind NGF or BDNF peptides.
